# Supplementary material for: Self-assembly and adhesive properties of Pollicipes pollicipes barnacle cement protein cp19k: influence of pH and ionic strength
Source: publisher site journal article supplement (doi:10.3762/bjnano.16.129), 2025-10-23
Supplement: Additional file 1 [file 2190-4286-16-129-S1.pdf]

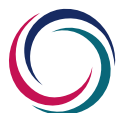

## Supporting Information

for

### **Self-assembly and adhesive properties of *Pollicipes pollicipes* barnacle cement protein cp19k: influence of pH and ionic strength**

Shrutika Sawant, Anne Marie Power and J. Gerard Wall

*Beilstein J. Nanotechnol.* **2025**, *16*, 1863–1872. [doi:10.3762/bjnano.16.129](https://doi.org/10.3762/bjnano.16.129)

## Additional figures

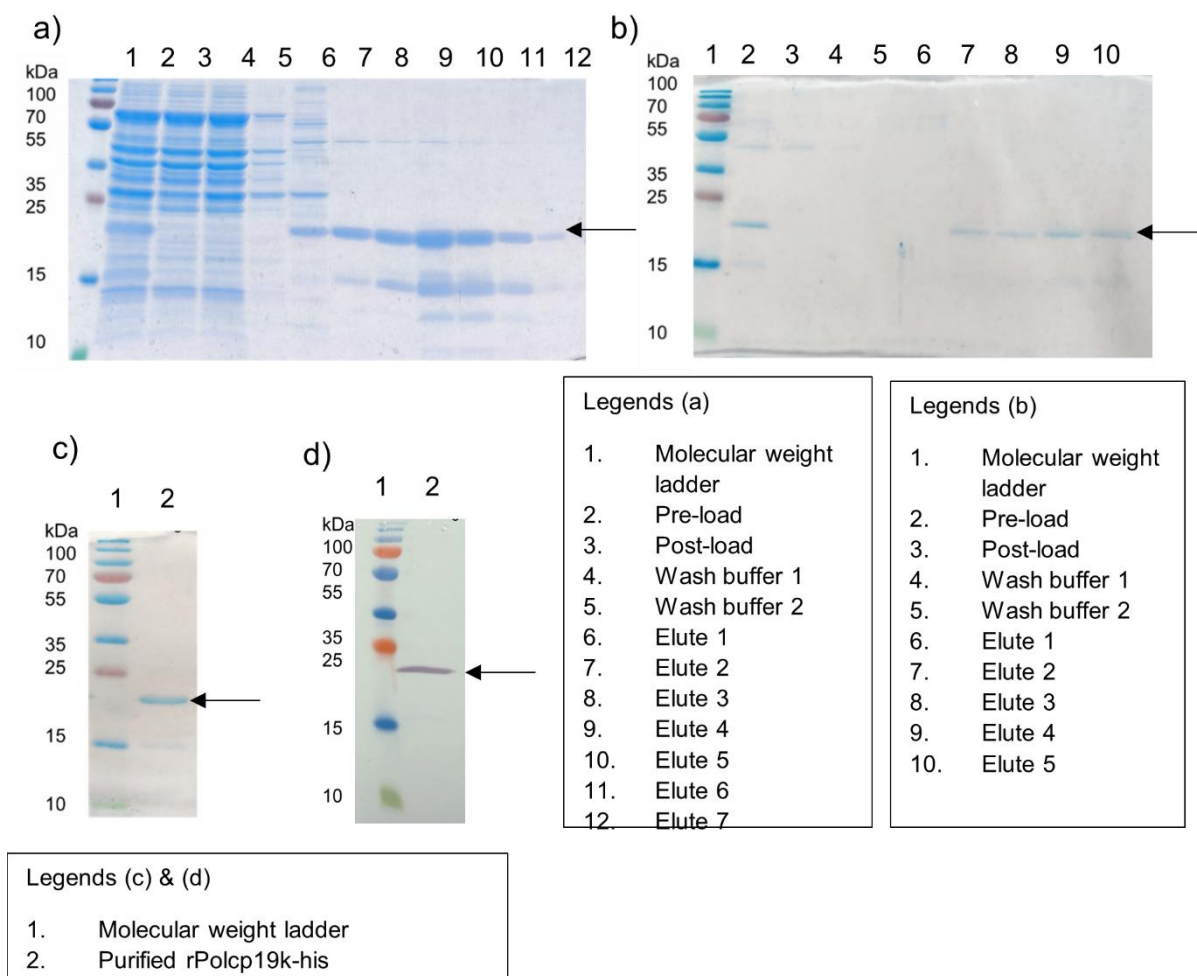

**Figure S1:** Expression and purification of rPolcp19k-his. SDS-PAGE analysis of a) IMAC and b) IEC purification of rPolcp19k-his. c), d): SDS-PAGE and Western blot analyses, respectively, of purified protein. Arrows indicate proteins of the expected size of pPolcp19k-his.

Protein samples were analysed under denaturing conditions in 15% SDS-PAGE. Gels were stained with InstantBlue® Coomassie Protein Stain (Abcam) or proteins were transferred to an Amersham Protran™ 0.2 µm nitrocellulose blotting membrane (GE Healthcare, Fischer scientific) for immunodetection of rPpolcp19k-his using a monoclonal anti-polyhistidine peroxidase-conjugated antibody (Sigma Aldrich, Ireland) diluted 1:1000 in Tris-buffered saline (25 mM Tris, pH 7.4, 150 mM NaCl). Colour was developed using Tetramethylbenzidine (TMB).

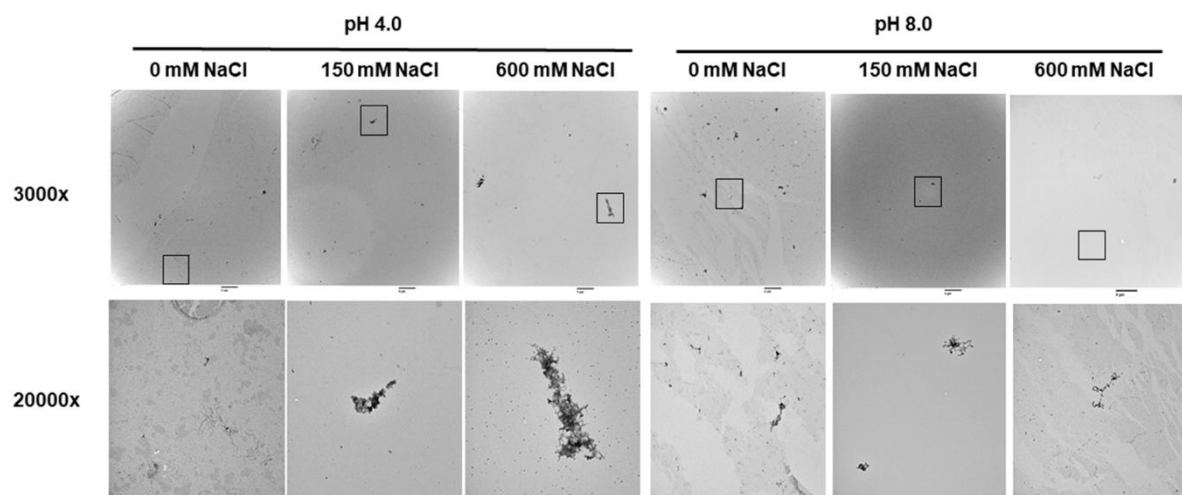

**Figure S2:** TEM images of rPolcp19k-his protein samples after incubation for 3 days under the indicated pH and salt conditions. Squares in 3000x magnification images represent areas shown at 20000x magnification in the corresponding panels below. Scale bar represents 4  $\mu\text{m}$  (3000x magnification images) or 600 nm (20000x magnification images).

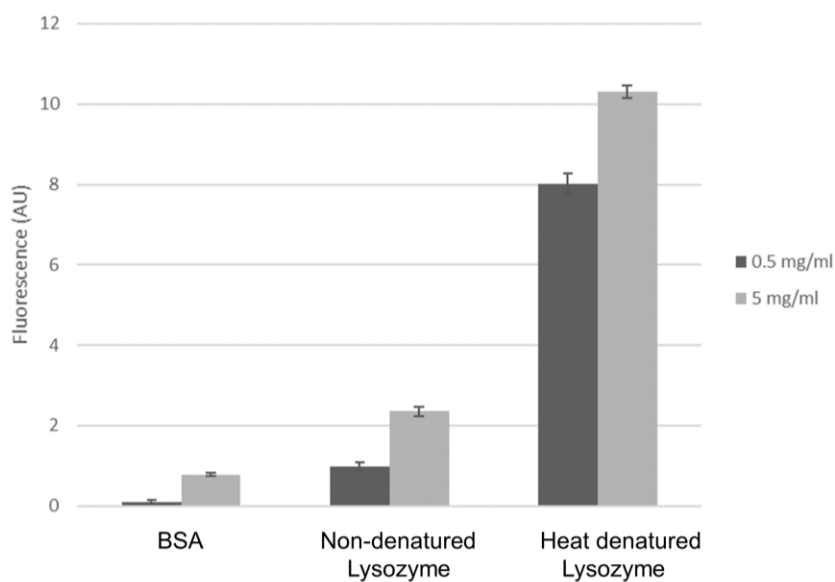

**Figure S3:** ThT assay controls: BSA and non-denatured lysozyme (negative control) and heat-denatured lysozyme were assayed at 5 mg/ml and 0.5 mg/ml. Results are presented in arbitrary units (AU) of fluorescence, as mean  $\pm$  standard deviation;  $n = 3$ .
